# Supplementary material
Source: HighWire-hosted journal article supplement (https://erj.ersjournals.com/content/56/6/2001441)
Supplement: inline-supplementary-material-3 [file inline-supplementary-material-3.pdf]

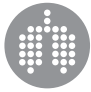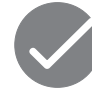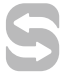

SHAREABLE PDF

# The undiagnosed disease burden associated with alpha-1 antitrypsin deficiency genotypes

Tomoko Nakanishi <sup>1,2,3,4,5</sup>, Vincenzo Forgetta <sup>2</sup>, Tomohiro Handa <sup>6</sup>,  
Toyohiro Hirai<sup>4</sup>, Vincent Mooser<sup>1,7</sup>, G. Mark Lathrop<sup>8</sup>,  
William O.C.M. Cookson <sup>9,10</sup> and J. Brent Richards <sup>1,2,11</sup>

**Affiliations:** <sup>1</sup>Dept of Human Genetics, McGill University, Montréal, QC, Canada. <sup>2</sup>Centre for Clinical Epidemiology, Dept of Medicine, Lady Davis Institute for Medical Research, Jewish General Hospital, McGill University, Montréal, QC, Canada. <sup>3</sup>Kyoto-McGill International Collaborative School in Genomic Medicine, Graduate School of Medicine, Kyoto University, Kyoto, Japan. <sup>4</sup>Dept of Respiratory Medicine, Graduate School of Medicine, Kyoto University, Kyoto, Japan. <sup>5</sup>Research Fellow of Japan Society for the Promotion of Science, Tokyo, Japan. <sup>6</sup>Dept of Advanced Medicine for Respiratory Failure, Graduate School of Medicine, Kyoto University, Kyoto, Japan. <sup>7</sup>Canada Excellence Research Chair in Genomic Medicine, McGill University, Montréal, QC, Canada. <sup>8</sup>McGill University and Genome Québec Innovation Centre, Montréal, QC, Canada. <sup>9</sup>National Heart and Lung Institute, Imperial College London, London, UK. <sup>10</sup>Royal Brompton and Harefield NHS Foundation Trust, London, UK. <sup>11</sup>Division of Endocrinology, Depts of Medicine, Human Genetics, Epidemiology and Biostatistics, Jewish General Hospital, McGill University, Montréal, QC, Canada.

**Correspondence:** J. Brent Richards, Pavillon H-413, Jewish General Hospital, 3755 Cote Ste Catherine, Montréal, QC, Canada, H3T 1E2. E-mail: [brent.richards@mcgill.ca](mailto:brent.richards@mcgill.ca)

@ERSpublications

**Only 6.4% of those with genotype-defined alpha-1 antitrypsin deficiency had been diagnosed with this serious disease in UK Biobank. Genotype-guided diagnosis could help to identify the thousands of people in the UK with this partially preventable disease.** <https://bit.ly/3dMu5Ng>

**Cite this article as:** Nakanishi T, Forgetta V, Handa T, *et al.* The undiagnosed disease burden associated with alpha-1 antitrypsin deficiency genotypes. *Eur Respir J* 2020; 56: 2001441 [<https://doi.org/10.1183/13993003.01441-2020>].

This single-page version can be shared freely online.

**ABSTRACT** Alpha-1 antitrypsin deficiency (AATD), mainly due to the PI\*ZZ genotype in *SERPINA1*, is one of the most common inherited diseases. Since it is associated with a high disease burden and partially prevented by smoking cessation, identification of PI\*ZZ individuals through genotyping could improve health outcomes.

We examined the frequency of the PI\*ZZ genotype in individuals with and without diagnosed AATD from UK Biobank, and assessed the associations of the genotypes with clinical outcomes and mortality. A phenotype-wide association study (PheWAS) was conducted to reveal disease associations with genotypes. A polygenic risk score (PRS) for forced expiratory volume in 1 s (FEV<sub>1</sub>)/forced vital capacity (FVC) ratio was used to evaluate variable penetrance of PI\*ZZ.

Among 458 164 European-ancestry participants in UK Biobank, 140 had the PI\*ZZ genotype and only nine (6.4%, 95% CI 3.4–11.7%) of them were diagnosed with AATD. Those with PI\*ZZ had a substantially higher odds of COPD (OR 8.8, 95% CI 5.8–13.3), asthma (OR 2.0, 95% CI 1.4–3.0), bronchiectasis (OR 7.3, 95%CI 3.2–16.8), pneumonia (OR 2.7, 95% CI 1.5–4.9) and cirrhosis (OR 7.8, 95% CI 2.5–24.6) diagnoses and a higher hazard of mortality (2.4, 95% CI 1.2–4.6), compared to PI\*MM (wildtype) (n=398 424). These associations were stronger among smokers. PheWAS demonstrated associations with increased odds of empyema, pneumothorax, cachexia, polycythaemia, aneurysm and pancreatitis. Polygenic risk score and PI\*ZZ were independently associated with FEV<sub>1</sub>/FVC <0.7 (OR 1.4 per 1-SD change, 95% CI 1.4–1.5 and OR 4.5, 95% CI 3.0–6.9, respectively).

The important underdiagnosis of AATD, whose outcomes are partially preventable through smoking cessation, could be improved through genotype-guided diagnosis.
